# Supplementary material for: Prediction of Drug-Target Interactions for Drug Repositioning Only Based on Genomic Expression Similarity
Source: PLoS Comput Biol. 2013 Nov 7;9(11):e1003315. doi: 10.1371/journal.pcbi.1003315 (PMC3820513; doi:10.1371/journal.pcbi.1003315)
Supplement: Data S1 — Cross validation performance of individual targets. (XLS) [file pcbi.1003315.s009.xls]

## Sheet: S1 Cross Validation
Data S1. Cross validation performance of individual targets.
Target Name	Alias	Number of Ligands	AUC (95% CI)	OR	P-value
Neurotransmitter Receptors
ADORA1		6	0.684 (0.497～0.817)	0	1
ADORA2A		5	0.712 (0.518～0.845)	0	1
ADRA1A*		45	0.681 (0.597～0.752)	3.66915	0.000456387
ADRA1B		21	0.696 (0.586～0.800)	2.83203	0.0537533
ADRA1D		14	0.710 (0.569～0.832)	2.46512	0.160332
ADRA2A		28	0.714 (0.614～0.804)	2.45668	0.058404
ADRA2B		14	0.635 (0.498～0.762)	1.50646	0.416357
ADRA2C		12	0.656 (0.501～0.796)	1.81085	0.341526
ADRB1		24	0.594 (0.505～0.684)	1.80781	0.217243
ADRB2		26	0.565 (0.475～0.661)	1.17697	0.491361
CHRM1		47	0.601 (0.526～0.673)	1.57778	0.192822
CHRM2		35	0.625 (0.541～0.707)	1.50525	0.273498
CHRM3		32	0.604 (0.519～0.694)	1.29359	0.40056
CHRM4		22	0.623 (0.512～0.725)	1.42969	0.380676
CHRM5		18	0.666 (0.542～0.785)	1.80155	0.269884
CHRNA2		10	0.597 (0.481～0.722)	1.00775	0.649985
DRD1*		28	0.756 (0.651～0.853)	6.75586	9.57e-06
DRD2*		43	0.723 (0.643～0.802)	4.84694	1.57e-05
DRD3*		16	0.683 (0.541～0.811)	5.41395	0.00360847
DRD4		12	0.531 (0.361～0.710)	1.81085	0.341526
DRD5		8	0.571 (0.354～0.755)	1.28681	0.570851
GRIN3A		6	0.628 (0.427～0.789)	0	1
HRH1		42	0.700 (0.632～0.763)	2.13072	0.0573116
HRH2^		7	0.692 (0.548～0.840)	3.60615	0.151404
HTR1A*		23	0.737 (0.655～0.816)	3.19301	0.023949
HTR1B^		10	0.766 (0.632～0.888)	3.88704	0.0709154
HTR1D*		8	0.784 (0.657～0.889)	5.40461	0.0392005
HTR2A*		38	0.762 (0.692～0.827)	4.68409	7.11e-05
HTR2B		10	0.779 (0.712～0.841)	2.26744	0.264048
HTR2C		17	0.730 (0.621～0.820)	2.774	0.0852581
HTR3A*		6	0.773 (0.573～0.953)	9.02308	0.016305
OPRD1*		5	0.924 (0.880～0.956)	36.1231	0.000485219
OPRK1*		5	0.924 (0.882～0.956)	36.1231	0.000485219
OPRM1*		5	0.886 (0.753～0.964)	36.1231	0.000485219
Ion Channels
CACNA1C*	Cav1.2	8	0.887 (0.811～0.953)	15.0128	0.000471168
CACNA1D*	Cav1.3	8	0.887 (0.811～0.952)	15.0128	0.000471168
CACNA1G	Cav3.1	5	0.729 (0.608～0.823)	0	1
CACNA1H	Cav3.2	8	0.781 (0.698～0.857)	1.28681	0.570851
CACNA1S*	Cav1.1	7	0.871 (0.792～0.944)	12.0205	0.00287899
CACNA2D1^		6	0.836 (0.764～0.911)	4.51154	0.115546
CACNA2D2		6	0.739 (0.648～0.828)	0	1
CACNB2*		7	0.906 (0.829～0.974)	22.5385	0.000192628
KCNH2*	hERG	15	0.713 (0.563～0.845)	7.90213	0.000354429
KCNJ1	Kir1.1	6	0.558 (0.362～0.739)	0	1
KCNMA1^	KCa1.1	7	0.632 (0.379～0.901)	3.60615	0.151404
SCN10A^	Nav1.8	10	0.657 (0.502～0.796)	3.88704	0.0709154
SCN5A	Nav1.5	19	0.457 (0.333～0.591)	2.4	0.118699
Nuclear Receptors
AR	NR3C4	8	0.522 (0.373～0.664)	0	1
ESR1	NR3A1	18	0.678 (0.555～0.800)	2.57364	0.101335
ESR2*	NR3A2	7	0.731 (0.549～0.903)	6.76154	0.0264348
NR3C1		23	0.641 (0.523～0.746)	2.51302	0.0754555
NR3C2		5	0.419 (0.261～0.540)	0	1
PGR	NR3C3	8	0.517 (0.349～0.675)	0	1
PPARG*	NR1C3	9	0.862 (0.724～0.962)	18	7.31e-05
Solute Carriers
SLC6A2		17	0.752 (0.670～0.837)	2.774	0.0852581
SLC6A3		6	0.487 (0.245～0.724)	1.80462	0.469508
SLC6A4		19	0.678 (0.578～0.778)	2.4	0.118699
SLC12A1		8	0.577 (0.432～0.726)	1.28681	0.570851
SLC12A3		6	0.667 (0.431～0.896)	1.80462	0.469508
Phosphodiesterases
PDE4A		6	0.703 (0.548～0.828)	0	1
PDE4B		10	0.630 (0.505～0.750)	0	1
PDE4D		5	0.683 (0.476～0.816)	0	1
Carbonic Anhydrases
CA1		13	0.426 (0.268～0.578)	2.71395	0.135489
CA2		13	0.447 (0.274～0.612)	2.71395	0.135489
CA4		11	0.468 (0.282～0.652)	3.39826	0.0905409
Cyclooxygenases
PTGS1*	COX-1	31	0.662 (0.565～0.751)	3.70759	0.00297183
PTGS2*	COX-2	32	0.679 (0.578～0.774)	4.11596	0.000975171
Monoamine Oxidases
MAOA^		6	0.753 (0.613～0.885)	4.51154	0.115546
MAOB^		5	0.777 (0.621～0.930)	6.02051	0.0823532
Other Targets
ABCC8^		8	0.660 (0.484～0.821)	3.00256	0.189062
ACE		5	0.611 (0.467～0.751)	0	1
ACHE		9	0.615 (0.461～0.749)	0	1
ALOX5*		7	0.778 (0.653～0.911)	6.76154	0.0264348
ATP1A1		8	0.593 (0.442～0.719)	0	1
CALM1*		15	0.860 (0.744～0.940)	13.5465	3.62e-06
DHFR		5	0.629 (0.507～0.758)	0	1
NQO2		5	0.594 (0.430～0.706)	0	1
TOP2A		11	0.613 (0.409～0.807)	0.906202	0.685013
* Well characterized targets
^ Potential well characterized targets (OR>3 and AUC>0.5) not passing the significance test
