# Supplementary material for: Prediction of Drug-Target Interactions for Drug Repositioning Only Based on Genomic Expression Similarity
Source: PLoS Comput Biol. 2013 Nov 7;9(11):e1003315. doi: 10.1371/journal.pcbi.1003315 (PMC3820513; doi:10.1371/journal.pcbi.1003315)
Supplement: Data S2 — Target-target interactions measured by the significance level of ligands enrichment. Target pairs known to share ligands in DrugBank are marked with dash (–) (XLS) [file pcbi.1003315.s010.xls]

## Sheet: S2 Target-target interactions
Data S2. Target-target interactions measured by the significance level of ligands enrichment. Target pairs known to share ligands in DrugBank are marked with dash (-).
		Ligands
		ADORA1	ADORA2A	ADRA1A	ADRA1B	ADRA1D	ADRA2A	ADRA2B	ADRA2C	ADRB1	ADRB2	CHRM1	CHRM2	CHRM3	CHRM4	CHRM5	CHRNA2	DRD1	DRD2	DRD3	DRD4	DRD5	GRIN3A	HRH1	HRH2	HTR1A	HTR1B	HTR1D	HTR2A	HTR2B	HTR2C	HTR3A	OPRD1	OPRK1	OPRM1	CACNA1C	CACNA1D	CACNA1G	CACNA1H	CACNA1S	CACNA2D1	CACNA2D2	CACNB2	KCNH2	KCNJ1	KCNMA1	SCN10A	SCN5A	AR
Targets	ADORA1	-	-	0.00478836	0.0036776	0.00963796	0.0577056	0.15928	0.113341	0.918324	0.93386	0.33189	0.271371	0.404071	0.176183	0.100472	0.265839	0.0193797	0.0659839	0.0699159	0.343656	0.569681	0.468423	0.246535	0.150647	0.00648979	0.265839	0.188154	0.0840494	0.651771	0.518216	0.0161706	0.409258	0.409258	1	0.0388961	0.0388961	0.0819077	0.569681	0.150647	-	-	0.0262232	0.450545	1	0.0262232	0.651771	0.297048	0.569681
	ADORA2A	-	-	0.0345537	0.0155568	0.418339	0.0575259	0.0460348	0.11314	0.708582	0.746126	0.511507	0.270834	0.634143	0.383091	0.5495	0.651473	0.0193042	0.0274477	0.211898	0.718008	1	1	0.245972	0.150456	0.00646236	0.265539	0.187924	0.0343666	0.651473	0.517784	0.468151	0.0817952	0.0817952	0.409006	0.569387	0.569387	0.409006	0.569387	0.521418	0.468151	1	0.521418	0.792253	0.468151	0.00283902	1	0.579739	0.569387
	ADRA1A	1	1	-	-	-	-	-	-	-	-	-	-	-	-	-	0.265591	-	-	-	-	-	0.468138	-	-	-	-	-	-	-	-	-	-	-	0.000478748	-	-	0.40899	0.569382	0.15048	-	1	-	-	0.468138	0.00284258	0.0716301	0.00926729	0.569382
	ADRA1B	1	1	-	-	-	-	-	-	-	-	-	-	-	-	-	0.264352	-	-	-	-	-	0.469799	-	-	-	-	-	-	-	-	-	1.09655e-05	1.09655e-05	0.000487097	-	-	0.41053	0.57117	0.151626	-	1	-	-	1	0.00288977	0.264352	0.0363421	1
	ADRA1D	1	1	-	-	-	-	-	-	-	-	-	-	-	-	-	0.26525	-	-	-	-	-	0.467874	-	-	-	-	-	-	-	-	-	-	-	0.00888274	-	-	0.0828163	0.1877	0.150269	-	1	-	-	0.467874	0.00283168	0.0714608	0.0366535	0.569089
	ADRA2A	1	1	-	-	-	-	-	-	-	-	-	-	-	-	-	0.26648	-	-	-	-	-	0.468975	-	-	-	-	-	-	-	-	-	-	-	0.00877009	0.188642	0.188642	0.409767	0.570282	0.151053	0.468975	1	0.151053	0.05704	-	0.00286578	0.0720202	0.00936162	0.570282
	ADRA2B	1	1	-	-	-	-	-	-	-	-	-	-	-	-	-	0.26525	-	-	-	-	-	0.467874	-	-	-	-	-	-	-	-	-	0.000491317	0.000491317	0.00888274	0.1877	0.1877	0.0828163	0.1877	0.150269	0.467874	1	0.150269	0.0136337	-	0.00283168	0.0714608	0.0366535	1
	ADRA2C	1	1	-	-	-	-	-	-	-	-	-	-	-	-	-	0.264649	-	-	-	-	-	0.470063	-	-	-	-	-	-	-	-	-	0.000488356	0.000488356	0.00884388	0.187239	0.187239	0.0825877	0.187239	0.151805	0.470063	1	0.151805	0.0575623	-	0.00289685	0.0132301	0.00914828	1
	ADRB1	1	1	-	-	-	-	-	-	-	-	-	-	-	-	-	0.265261	-	0.00343229	0.0176794	0.112972	0.187707	0.467869	-	0.150273	-	-	0.0387509	-	0.265261	0.0841554	0.00131782	0.000491567	0.000491567	0.00888528	0.0387509	0.0387509	0.411298	-	0.150273	0.114647	-	0.0261221	-	1	0.0028325	0.0714707	0.00922174	1
	ADRB2	1	1	-	-	-	-	-	-	-	-	-	-	-	-	-	0.265869	0.00558264	0.00347479	0.0177911	0.113379	0.188174	0.468421	-	0.150662	-	-	0.0389087	-	0.651778	0.0845415	0.0161756	0.00873129	0.00873129	0.0819147	0.0389087	0.0389087	0.409254	0.569684	0.150662	0.114956	1	0.0262316	-	1	0.00284908	0.0717447	0.00929137	1
	CHRM1	1	1	-	-	-	-	-	-	-	-	-	-	-	-	-	-	-	-	-	-	-	-	-	-	-	-	-	-	-	-	-	-	-	0.0820382	-	-	0.40951	0.188432	0.026296	-	0.4687	-	0.0133536	1	0.0028595	-	-	1
	CHRM2	1	1	-	-	-	-	-	-	-	-	-	-	-	-	-	-	-	-	-	-	-	-	-	-	-	-	-	-	-	-	-	-	-	0.0818031	-	-	0.0818031	0.0388355	0.0261806	-	0.468142	-	0.00241857	1	0.00284167	-	-	1
	CHRM3	1	1	-	-	-	-	-	-	-	-	-	-	-	-	-	-	-	-	-	-	-	-	-	-	-	-	-	-	-	-	-	-	-	-	-	-	0.0826054	0.0385979	0.0265637	-	0.470087	-	-	0.470087	0.00289955	0.0712059	-	1
	CHRM4	1	1	-	-	-	-	-	-	-	-	-	-	-	-	-	0.264655	-	-	-	-	-	0.470075	-	-	-	-	-	-	-	-	-	-	-	0.0825965	-	-	0.410786	0.187241	0.0265569	-	0.470075	-	0.0024848	0.470075	0.00289819	0.071198	0.0091527	1
	CHRM5	1	1	-	-	-	-	-	-	-	-	-	-	-	-	-	0.26646	-	-	-	-	-	0.468972	-	-	-	-	-	-	-	-	-	-	-	0.0821387	-	-	0.409765	0.188629	0.0263366	-	0.468972	-	0.00244515	0.468972	0.00286469	0.0720059	0.00935546	1
	CHRNA2	0.469515	0.410269	0.00490346	0.0152886	0.0454903	0.0196849	0.160347	0.112154	0.706475	0.748141	-	-	-	0.380682	0.269913	-	0.0196849	0.0010107	0.0705668	0.34153	0.570861	-	0.413105	0.151418	0.0239595	0.070921	0.189079	0.0127417	0.649975	0.51995	-	1.09156e-05	1.09156e-05	0.000485417	0.189079	0.189079	0.410269	0.570861	0.151418	0.469515	1	0.151418	0.186447	0.469515	0.0264406	-	0.0372875	1
	DRD1	1	1	-	-	-	-	-	-	-	0.262067	-	-	-	-	-	0.26648	-	-	-	-	-	0.468975	-	0.522286	-	-	-	-	-	-	-	0.000482857	0.000482857	0.00877009	0.0390673	0.0390673	0.409767	0.188642	0.0263417	0.115266	0.468975	0.0263417	-	0.468975	0.00286578	0.0720202	0.00936162	1
	DRD2	1	1	-	-	-	-	-	-	0.438635	0.493075	-	-	-	-	-	0.264974	-	-	-	-	-	-	-	-	-	-	-	-	-	-	-	0.000490557	0.000490557	0.00887055	-	-	-	-	-	0.11606	0.47038	0.0260735	-	0.47038	0.00282579	0.0713523	0.00919677	1
	DRD3	1	1	-	-	-	-	-	-	0.704765	0.746512	-	-	-	-	-	0.265854	-	-	-	-	-	0.468422	-	0.150655	-	-	-	-	-	-	-	0.000479759	0.000479759	0.00872996	0.0389023	0.0389023	0.409256	0.188164	0.0262274	0.114951	0.468422	0.0262274	-	0.468422	0.00284813	0.0717326	0.00928581	0.569682
	DRD4	1	1	-	-	-	-	-	-	0.70732	0.748948	-	-	-	-	-	0.264649	-	-	-	-	-	0.470063	-	0.151805	-	-	-	-	-	-	-	0.000488356	0.000488356	0.00884388	0.187239	0.187239	0.0825877	0.187239	0.151805	0.470063	1	0.151805	0.00248292	0.470063	0.00289685	0.0711902	0.00914828	1
	DRD5	1	1	-	-	-	-	-	-	0.70563	0.747335	-	-	-	-	-	0.652368	-	-	-	-	-	0.468969	-	0.0263316	-	-	-	-	-	-	-	0.0004825	0.0004825	0.00876684	0.188615	0.188615	0.0821334	0.188615	0.151032	0.468969	1	0.151032	0.057017	1	0.00286362	0.0719918	0.0370709	1
	GRIN3A	0.468423	0.409258	0.00152891	0.0036776	0.00963796	0.0193797	0.0450488	0.0268002	0.704786	0.746529	-	-	-	0.0196935	0.00692504	-	0.00557247	-	0.00355483	0.113341	0.188154	-	-	0.150647	0.0244471	0.0717207	0.0388961	0.00115443	0.265839	-	-	-	-	-	0.0388961	0.0388961	0.409258	0.569681	0.150647	0.114945	1	0.0262232	0.0132917	0.0161706	-	-	0.0368558	0.569681
	HRH1	1	1	-	-	-	-	-	-	-	-	-	-	-	-	-	0.264666	-	-	-	-	-	-	-	-	-	-	-	-	-	-	-	-	-	0.0826145	-	-	-	-	-	0.470099	1	0.151855	-	0.470099	0.00290093	-	0.00916175	1
	HRH2	0.115098	0.0820204	-	-	-	-	-	-	0.918491	0.934007	-	-	-	-	-	0.266139	0.00559876	-	0.0700779	0.344013	0.569976	0.468696	-	-	-	0.266139	0.188385	-	-	-	0.0162049	0.00874772	0.00874772	0.0820204	0.188385	0.188385	0.0820204	0.569976	0.150839	0.468696	1	0.150839	0.0568816	0.115098	0.00285539	0.0134051	0.0093148	0.569976
	HTR1A	1	1	-	-	-	-	-	-	-	-	-	-	-	-	-	0.264958	-	-	-	-	-	0.470351	-	-	-	-	-	-	-	-	-	-	-	-	0.187474	0.187474	0.0827116	0.187474	0.15008	0.470351	1	0.15008	0.0577165	0.470351	0.00282425	0.0713342	0.00918714	1
	HTR1B	1	1	-	-	-	-	-	-	-	-	-	-	-	-	-	0.264049	-	-	-	-	-	0.469515	-	0.522851	-	-	-	-	-	-	-	0.000485417	0.000485417	-	0.189079	0.189079	0.0823601	0.189079	0.151418	0.469515	1	0.151418	0.0572889	1	0.00288018	0.070921	0.0372875	0.570861
	HTR1D	1	1	-	-	-	-	-	-	0.435982	0.26202	-	-	-	-	-	0.26644	-	-	-	-	-	0.468969	-	0.151032	-	-	-	-	-	-	-	0.0004825	0.0004825	0.00876684	0.188615	0.188615	0.0821334	0.188615	0.151032	0.468969	1	0.151032	0.057017	0.468969	0.00286362	0.0719918	0.0370709	1
	HTR2A	1	1	-	-	-	-	-	-	-	-	-	-	-	-	-	0.2665	-	-	-	-	-	0.468979	-	-	-	-	-	-	-	-	-	-	-	0.00877175	0.039075	0.039075	0.0821494	0.039075	0.0263468	0.115274	0.468979	0.0263468	-	0.468979	0.00286688	0.0720347	0.00936787	1
	HTR2B	1	1	-	-	-	-	-	-	0.706475	0.748141	-	-	-	-	-	0.264049	-	-	-	-	-	0.469515	-	-	-	-	-	-	-	-	0.00134055	0.00880525	0.00880525	0.0823601	0.0392091	0.0392091	0.0823601	0.0392091	0.0264406	0.115556	0.469515	0.0264406	0.00246317	0.469515	0.00288018	0.013159	0.00941908	1
	HTR2C	1	1	-	-	-	-	-	-	0.435465	0.489766	-	-	-	-	-	0.266157	-	-	-	-	-	-	-	-	-	-	-	-	-	-	-	-	-	-	0.0389809	0.0389809	0.0820248	0.0389809	0.0262819	0.115104	0.468697	0.0262819	-	0.468697	0.0028564	0.0134099	0.00932056	1
	HTR3A	0.468423	0.409258	-	-	-	-	-	-	0.704786	0.746529	-	-	-	-	-	-	-	-	-	-	-	-	-	0.150647	-	-	-	-	0.651771	-	-	0.000479605	-	-	0.0388961	0.0388961	0.409258	0.188154	0.0262232	0.114945	0.468423	0.0262232	-	0.468423	0.00284719	-	0.00928033	1
	OPRD1	1	1	-	0.000118069	-	-	0.0460348	0.0267319	0.439576	0.488692	-	-	-	-	-	0.265539	5.58342e-05	7.19424e-05	0.0177238	0.11314	0.187924	-	-	0.150456	-	0.00175507	0.0052314	-	0.0715857	-	0.0161364	-	-	-	0.187924	0.187924	0.409006	0.569387	0.150456	0.468151	1	0.150456	0.0132496	0.468151	0.00283902	0.265539	0.0367488	0.0388183
	OPRK1	1	1	-	0.000118069	-	-	0.0460348	0.0267319	0.439576	0.488692	-	-	-	-	-	0.265539	5.58342e-05	7.19424e-05	0.0177238	0.11314	0.187924	-	-	0.150456	-	0.00175507	0.0052314	-	0.0715857	-	-	-	-	-	0.187924	0.187924	0.409006	0.569387	0.150456	0.468151	1	0.150456	0.0132496	0.468151	0.00283902	0.265539	0.0367488	0.0388183
	OPRM1	1	1	0.000440483	0.000717888	0.00991793	0.000296541	0.0460348	0.0267319	0.708582	0.746126	0.331217	0.467772	-	0.661459	0.5495	0.265539	0.0013757	7.19424e-05	0.0177238	0.11314	0.187924	-	0.127562	0.521418	-	-	0.0052314	0.00399735	0.265539	-	-	-	-	-	0.187924	0.187924	0.409006	0.569387	0.150456	0.468151	1	0.150456	0.0566121	0.468151	0.00283902	0.265539	0.0367488	0.187924
	CACNA1C	1	1	-	-	-	0.0580669	0.415569	0.340819	0.435982	0.4903	-	-	-	-	-	0.26644	0.0195317	-	0.0178896	0.111755	0.570271	0.468969	-	0.151032	0.0750719	0.26644	0.188615	0.00116939	0.652368	0.240726	0.00133267	1.08318e-05	1.08318e-05	0.0004825	-	-	-	-	-	-	-	-	-	0.468969	0.00286362	0.26644	-	1
	CACNA1D	1	1	-	-	-	0.0580669	0.415569	0.340819	0.435982	0.4903	-	-	-	-	-	0.26644	0.0195317	-	0.0178896	0.111755	0.570271	0.468969	-	0.151032	0.0750719	0.26644	0.188615	0.00116939	0.652368	0.240726	0.00133267	1.08318e-05	1.08318e-05	0.0004825	-	-	-	-	-	-	-	-	-	0.468969	0.00286362	0.26644	-	1
	CACNA1G	0.468151	0.409006	0.00476004	0.0155568	0.0460348	0.0575259	0.161668	0.11314	0.708582	0.746126	0.700828	0.690084	0.403484	0.175837	0.26795	0.265539	0.0575259	-	0.0697543	0.3433	0.569387	0.468151	-	0.150456	0.00646236	0.0715857	0.187924	0.0343666	1	0.517784	0.0161364	0.000478165	0.000478165	0.00870964	-	-	-	-	-	0.468151	1	-	-	1	0.0261693	0.0715857	-	0.569387
	CACNA1H	1	1	0.000450599	0.000120224	0.000205038	0.00139867	0.0452689	0.0262641	-	0.747335	0.333239	0.272449	0.630321	0.379713	0.269125	0.26644	0.00030224	-	0.00358277	0.0262641	0.188615	0.468969	-	0.151032	0.0237947	0.0719918	0.0390522	0.000301789	0.26644	0.0848943	0.00133267	0.0004825	0.0004825	0.00876684	-	-	-	-	-	-	-	-	-	0.468969	0.00286362	0.0719918	-	0.570271
	CACNA1S	1	1	0.0136485	0.0548089	0.0451587	0.0578859	0.415172	0.344013	0.705208	0.746932	0.0979711	0.135199	0.217651	0.0653143	0.0295991	0.266139	0.0194555	-	0.0178341	0.113542	0.569976	0.468696	-	0.150839	0.0748719	0.266139	0.188385	0.00116189	0.652069	0.240363	0.00132875	1.07902e-05	1.07902e-05	0.00048105	-	-	-	-	-	-	-	-	-	0.468696	0.00285539	0.266139	-	1
	CACNA2D1	-	0.409258	-	-	-	0.0577056	0.414776	0.343656	0.434953	0.489228	-	-	-	-	-	0.265839	0.0193797	0.00346274	0.0177789	0.113341	0.569681	0.468423	0.246535	0.150647	0.0766663	0.265839	0.188154	0.00401987	0.651771	0.24	0.00132485	0.00872865	0.00872865	0.0819077	-	-	0.409258	-	-	-	-	-	-	0.468423	0.0262232	0.0717207	0.117716	1
	CACNA2D2	-	1	0.00152891	0.000721628	0.00963796	0.0193797	0.15928	0.113341	-	0.746529	0.512224	0.468392	0.404071	0.176183	0.100472	0.265839	0.00138331	1.66042e-05	0.00355483	0.0268002	0.188154	0.468423	0.127946	0.521704	0.0766663	0.0717207	0.0388961	6.90292e-05	0.651771	0.0845121	0.00132485	0.0819077	0.0819077	0.0819077	-	-	0.409258	-	-	-	-	-	-	0.468423	0.150647	0.0717207	0.117716	0.569681
	CACNB2	1	1	-	-	-	0.0578859	0.415172	0.344013	0.435467	0.489764	-	-	-	-	-	0.0718561	0.0194555	0.000989978	0.0178341	0.113542	0.569976	0.115098	0.128331	0.0262773	0.0748719	0.266139	0.188385	0.00116189	0.652069	0.240363	0.00132875	0.00874772	0.00874772	0.0820204	-	-	-	-	-	-	-	-	-	0.468696	0.00285539	0.266139	-	1
	KCNH2	1	1	-	-	-	0.0575457	0.161694	0.343317	-	-	0.0445241	0.0577001	-	0.175868	0.100268	0.265552	-	-	-	0.343317	0.569386	0.468148	-	0.521416	0.00646794	0.0715965	0.187932	-	0.651474	-	-	0.000478307	0.000478307	0.0087108	-	-	-	-	-	-	-	-	-	1	-	0.265552	-	0.569386
	KCNJ1	0.468423	0.409258	0.00478836	0.0036776	0.00963796	-	-	-	0.918324	0.93386	0.33189	0.468392	0.634687	0.383576	0.268341	0.265839	0.0193797	0.00105122	0.0177789	0.343656	0.569681	0.468423	0.417135	0.150647	0.0766663	0.265839	0.188154	0.0345052	0.651771	0.518216	0.0161706	0.0819077	0.0819077	0.409258	0.569681	0.569681	1	0.569681	0.521704	0.468423	1	0.521704	0.185246	-	0.00284719	0.0717207	0.0368558	0.569681
	KCNMA1	0.468696	0.40951	0.00153926	0.0156683	0.0451587	0.0194555	0.159546	0.113542	0.705208	0.746932	0.191312	0.271909	0.217651	0.17653	0.268733	0.652069	0.0578859	0.0638562	0.0700779	0.344013	0.569976	-	0.247099	0.150839	0.00625129	0.0718561	0.188385	0.0346443	1	0.240363	0.115098	0.00048105	0.00048105	0.00874772	0.188385	0.188385	0.0820204	0.569976	0.150839	0.468696	1	0.150839	-	1	-	0.0718561	0.0369632	0.188385
	SCN10A	0.469515	0.410269	0.0138604	0.0152886	0.0454903	0.0584308	0.160347	0.112154	0.918992	0.934446	-	-	0.400567	0.380682	0.269913	-	0.00567844	0.000277084	0.0180011	0.34153	0.570861	-	-	0.151418	0.0754738	0.264049	0.189079	0.00411131	0.264049	0.0852785	-	0.00880525	0.00880525	0.0823601	0.189079	0.189079	0.0823601	0.189079	0.151418	0.469515	1	0.151418	0.0572889	0.469515	0.00288018	-	-	1
	SCN5A	0.469247	0.41002	0.00488138	0.0536271	0.160093	0.0582743	0.415971	0.341176	0.706041	0.74773	-	-	-	0.380199	0.269545	0.266763	0.0196218	0.00332848	0.070419	0.341176	0.570574	0.469247	0.242668	0.151236	0.00630895	0.0721431	0.188862	0.0126936	0.652677	0.241113	0.0162772	0.00878778	0.00878778	0.0822528	-	-	-	-	-	0.469247	1	-	-	0.469247	0.00287302	-	-	0.188862
	AR	1	1	0.0137187	0.0157244	0.415569	0.0580669	0.159813	0.111755	0.918658	0.934153	0.858715	0.875039	0.964167	0.899552	0.849329	0.26644	0.0580669	0.0266226	0.0702404	0.340819	0.570271	0.468969	0.800238	0.151032	0.00627792	0.0134411	0.188615	0.180295	1	0.240726	0.0162394	0.0004825	0.0004825	1.08318e-05	0.188615	0.188615	0.0821334	0.570271	0.151032	0.468969	1	0.151032	0.057017	0.468969	0.00286362	0.652368	0.0370709	-
	ESR1	1	1	0.000451641	0.00371352	0.0452778	0.00563068	0.159824	0.111762	0.705615	0.747324	0.333276	0.691645	0.399392	0.379711	0.269148	0.26646	0.00140056	0.00027346	0.0702548	0.340817	0.570276	0.468972	0.242106	0.0263366	0.0750872	0.26646	0.188629	0.0011715	1	0.240746	0.00133316	-	-	-	0.0390597	0.0390597	0.409765	0.188629	0.0263366	0.115258	0.468972	0.0263366	0.00244515	0.468972	0.00286469	0.26646	0.0370857	-
	ESR2	1	1	6.40081e-06	0.00072539	0.00966919	0.00559876	0.159546	0.113542	0.705208	0.489764	0.332564	0.469014	0.635231	0.384061	0.268733	0.0718561	0.00559876	0.000989978	0.0700779	0.344013	0.569976	0.468696	0.417812	0.150839	0.00625129	0.0134051	0.188385	0.00116189	1	0.240363	5.93752e-05	0.00874772	0.00874772	0.00874772	0.569976	0.569976	1	0.569976	0.52199	0.468696	1	0.52199	0.0133339	0.468696	0.00285539	0.652069	0.297467	0.188385
	NR3C1	1	1	0.0016063	0.0542351	0.161175	0.0191742	0.417578	0.342614	0.707745	0.749357	0.189298	0.27521	0.215869	0.382157	0.267184	0.0713342	0.0191742	0.00103402	0.0181793	0.342614	0.568788	0.470351	0.126883	0.15008	0.00641819	0.0713342	0.187474	0.0123396	1	0.238927	0.00135313	0.000490071	0.000490071	0.00886567	0.187474	0.187474	0.411042	0.568788	0.15008	0.470351	1	0.15008	0.0135973	1	0.0260675	0.0713342	0.00918714	-
	NR3C2	1	1	0.00151864	0.0155568	0.161668	0.00554633	0.161668	0.11314	0.439576	0.488692	0.0972978	0.134471	0.0989317	0.383091	0.26795	0.0715857	0.00554633	0.00104402	0.00354096	0.11314	0.187924	0.468151	0.127562	0.521418	0.00646236	0.0133334	0.0388183	0.0124385	0.651473	0.0843218	0.00132096	0.000478165	0.000478165	0.00870964	-	-	0.409006	-	-	-	-	-	0.0566121	1	0.0261693	0.265539	0.117465	-
	PGR	1	1	0.0137187	0.156309	0.159813	0.00562518	0.159813	0.111755	0.70563	0.747335	0.333239	0.469636	0.213528	0.173449	0.100914	0.26644	0.00562518	1.54609e-05	0.0178896	0.111755	0.188615	0.468969	0.124937	0.151032	0.0237947	0.0719918	0.0390522	1.47387e-05	0.652368	0.0848943	0.00133267	1.08318e-05	1.08318e-05	0.0004825	0.00527571	0.00527571	0.409763	0.0390522	0.00286362	0.0162394	0.11525	0.00286362	0.057017	0.11525	0.0263316	0.26644	0.118221	-
	PPARG	0.469242	0.410016	0.0137894	0.153504	0.16008	0.00140642	0.16008	0.111954	0.706052	0.747738	0.0986493	0.272989	0.630867	0.380197	0.269519	0.266741	0.00140642	0.00027495	0.0179453	0.111954	0.188847	0.469242	0.242645	0.026386	0.023877	0.0721279	0.0391306	0.00117694	0.266741	0.0850861	0.0013366	0.000483956	0.000483956	0.00878601	0.188847	0.188847	0.410016	0.570566	0.151225	0.469242	1	0.151225	0.0134187	0.469242	0.00287189	0.266741	0.037179	0.188847
	SLC6A2	1	1	-	-	-	-	-	-	-	-	-	-	-	-	-	0.0718691	-	-	0.070091	0.344036	0.569979	-	-	-	-	-	-	-	-	-	0.0162077	-	-	-	0.569979	0.569979	1	0.569979	0.521993	0.468697	1	0.521993	0.056892	0.468697	0.0028564	-	-	0.569979
	SLC6A3	0.468423	0.409258	-	-	0.15928	-	-	-	-	-	-	-	0.404071	0.383576	0.268341	-	-	-	-	-	-	-	-	0.150647	-	0.0717207	0.188154	-	-	-	-	1.07488e-05	1.07488e-05	0.000479605	0.188154	0.188154	0.409258	0.569681	0.150647	0.468423	1	0.150647	0.0567467	0.468423	0.00284719	-	-	0.188154
	SLC6A4	1	1	-	-	-	-	-	-	-	-	-	-	-	-	-	-	-	-	0.070419	0.341176	0.570574	-	-	-	-	0.266763	0.188862	-	-	-	0.0162772	-	-	-	-	-	-	0.570574	-	0.469247	1	-	-	0.115412	0.00287302	-	-	1
	SLC12A1	0.0162394	0.00876684	0.0801042	0.156309	0.415569	0.146349	0.415569	0.340819	0.70563	0.747335	0.333239	0.272449	0.399394	0.173449	0.269125	0.26644	0.0195317	0.0266226	0.212893	0.340819	1	0.468969	0.0569068	0.151032	0.00627792	0.0719918	0.188615	0.0347841	1	0.519082	0.11525	0.409763	0.409763	1	0.570271	0.570271	0.409763	0.570271	0.522277	0.468969	1	0.522277	1	0.468969	-	0.652368	0.581062	0.570271
	SLC12A3	0.468423	0.409258	0.0135786	0.0036776	0.15928	0.0577056	0.15928	0.113341	0.434953	0.489228	0.857968	0.874459	0.964951	0.661893	0.549938	0.0717207	0.0577056	0.0659839	0.0699159	0.343656	0.569681	0.468423	0.417135	0.150647	0.0766663	0.0717207	0.188154	0.0840494	1	0.24	0.0161706	0.0819077	0.0819077	0.0819077	0.0388961	0.0388961	0.0819077	0.569681	0.150647	0.114945	1	0.0262232	0.185246	0.468423	-	0.265839	0.117716	0.569681
	PDE4A	-	-	0.00478836	0.0156124	0.0450488	0.00557247	0.15928	0.113341	0.704786	0.746529	0.512224	0.468392	0.404071	0.383576	0.268341	0.651771	0.0193797	0.00346274	0.0699159	0.343656	0.569681	0.468423	-	0.150647	0.00648979	0.0717207	0.188154	0.0840494	0.651771	0.518216	0.114945	0.00872865	0.00872865	0.0819077	-	0.188154	0.409258	0.569681	0.150647	0.468423	1	0.150647	0.450545	0.468423	0.0262232	0.265839	0.117716	0.569681
	PDE4B	-	-	0.0138604	0.0152886	0.0454903	0.0584308	0.160347	0.112154	0.706475	0.748141	0.5151	0.470883	0.631413	0.380682	0.269913	0.264049	0.0196849	0.00999532	0.0705668	0.34153	0.570861	0.469515	-	0.151418	0.00140741	0.070921	0.189079	0.0851518	0.649975	0.51995	0.0163085	0.0823601	0.0823601	0.410269	0.189079	0.189079	0.410269	0.570861	0.151418	0.469515	1	0.151418	0.186447	1	0.00288018	0.649975	0.298729	0.570861
	PDE4D	-	-	0.0135091	0.0155568	0.0460348	0.0575259	0.161668	0.11314	0.439576	0.488692	0.190275	0.134471	0.216724	0.383091	0.26795	0.651473	0.0193042	0.00104402	0.0697543	0.3433	0.569387	0.468151	-	0.150456	0.00646236	0.265539	0.187924	0.0124385	0.651473	0.239638	0.114793	0.0817952	0.0817952	0.409006	0.0388183	0.0388183	0.0817952	0.187924	0.0261693	0.468151	1	0.150456	0.450134	0.468151	0.0261693	0.651473	0.29663	0.569387
	CA1	0.470338	0.41103	0.00499172	0.0154541	0.045825	0.0191642	0.161153	0.112755	0.707743	0.749352	0.510058	0.472759	0.402332	0.382139	0.267177	0.264949	0.0191642	0.0101551	0.0710598	0.342601	0.568793	0.470338	0.244891	0.150077	0.00641299	0.0713253	0.187469	0.0123294	0.650873	0.238921	0.016413	0.00886328	0.00886328	0.0827019	-	-	-	-	-	-	1	-	0.453439	0.470338	-	0.650873	-	0.187469
	CA2	0.470338	0.41103	0.00499172	0.0154541	0.045825	0.0191642	0.161153	0.112755	0.707743	0.749352	0.510058	0.472759	0.402332	0.382139	0.267177	0.264949	0.0191642	0.0101551	0.0710598	0.342601	0.568793	0.470338	0.244891	0.150077	0.0242092	0.0713253	0.187469	0.0123294	0.650873	0.238921	0.016413	0.000489834	0.000489834	0.00886328	0.568793	0.568793	-	-	0.52084	0.470338	1	0.52084	0.453439	0.116018	-	0.650873	-	0.568793
	CA4	0.11571	0.0824738	0.0139319	0.0153436	0.0456015	0.0197621	0.160615	0.112353	0.437531	0.491914	0.515821	0.471507	0.401154	0.381167	0.270307	0.264348	0.0197621	0.0033645	0.0707307	0.341886	0.571157	0.469789	0.0575555	0.151611	0.0240424	0.0710554	0.189311	0.00413452	0.650274	0.24182	0.00134451	0.00882454	0.00882454	0.0824738	0.189311	0.189311	-	-	0.151611	0.469789	1	0.151611	0.0574254	0.11571	-	0.264348	-	0.571157
	PTGS1	0.115733	0.0824897	0.00494784	0.0153579	0.0456248	0.0197923	0.160651	0.112377	0.919141	0.93458	0.515879	0.471547	0.401177	0.381186	0.270372	0.264356	0.0197923	0.00337477	0.0707675	0.3419	0.571183	0.469808	0.413807	0.151641	0.00636811	0.264356	0.189349	0.0352627	0.650257	0.520419	0.016351	0.00882872	0.00882872	0.0824897	0.189349	0.189349	0.410538	0.571183	0.151641	0.469808	1	0.151641	0.057455	-	0.00289106	0.071069	0.0091226	-
	PTGS2	0.115889	0.0826054	0.00497782	0.015414	0.0457381	0.0570377	0.160924	0.11258	0.919311	0.934729	0.336071	0.274703	0.215432	0.174872	0.266794	0.26466	0.019108	0.00339573	0.0709345	0.342263	0.568481	0.470087	0.414495	0.151838	0.02415	0.26466	0.187244	0.0340063	0.650562	0.52086	0.0163864	0.00884837	0.00884837	0.0826054	0.187244	0.187244	0.0826054	0.568481	0.151838	0.470087	1	0.151838	0.0575941	0.470087	0.00289955	0.0712059	0.00915718	-
	MAOA	0.468423	0.409258	-	0.0156124	0.414776	-	-	-	-	-	-	0.874459	0.842774	0.661893	0.848863	0.265839	-	-	0.0699159	0.343656	0.569681	0.468423	0.930671	0.150647	0.0766663	0.265839	0.188154	-	-	-	0.0161706	0.409258	0.409258	0.409258	0.569681	0.569681	-	-	0.521704	0.468423	1	0.521704	0.450545	0.468423	0.00284719	0.265839	-	0.569681
	MAOB	0.468151	0.409006	-	0.0155568	0.418339	-	-	-	-	-	0.700828	0.874169	0.842446	0.661459	0.848631	0.265539	0.0575259	0.0657409	0.0697543	0.3433	0.569387	0.114793	0.617325	0.150456	0.0243633	0.265539	0.187924	-	1	0.517784	0.0161364	1	1	1	0.569387	0.569387	-	-	0.521418	0.468151	1	0.521418	0.792253	0.468151	0.0261693	0.265539	-	0.569387
	ABCC8	1	1	0.0137187	0.000729174	0.0452689	0.146349	0.159813	0.111755	0.70563	0.747335	0.954071	0.875039	0.840125	0.658408	0.550815	0.26644	0.0580669	0.00989031	0.0702404	0.340819	0.570271	0.11525	0.929029	0.151032	0.194576	0.26644	0.188615	0.180295	1	0.519082	0.0162394	0.409763	0.409763	0.409763	0.0390522	0.0390522	0.409763	0.570271	0.151032	0.11525	1	0.0263316	0.057017	-	0.00286362	0.26644	0.0370709	0.188615
	ACE	1	1	0.000116568	0.000717888	0.000211934	0.00554633	0.00991793	0.00465021	0.919828	0.933713	0.00679276	0.00706328	0.0131173	0.0196246	0.0294236	0.651473	0.0013757	1.64495e-05	0.00354096	0.11314	0.187924	1	0.00022044	0.150456	0.00144187	0.0715857	0.0388183	0.000295288	0.0715857	0.0843218	0.0161364	0.0817952	0.0817952	0.409006	1	1	0.409006	0.569387	1	1	1	1	0.0566121	0.114793	0.00283902	0.0133334	0.0367488	1
	ACHE	1	1	-	0.0536157	0.16008	0.00565174	0.16008	0.111954	0.706052	0.747738	-	-	0.39998	0.380197	0.269519	-	-	-	0.0179453	0.111954	0.188847	0.469242	0.125315	0.151225	0.00140029	0.0134773	0.0391306	-	-	-	-	0.00878601	0.00878601	0.0822467	0.188847	0.188847	0.410016	0.570566	0.151225	0.469242	1	0.151225	0.0134187	0.469242	0.00287189	0.652667	0.118474	0.570566
	ALOX5	0.468696	0.40951	0.00481686	0.0156683	0.0451587	0.0578859	0.159546	0.113542	0.918491	0.934007	0.332564	0.271909	0.404659	0.384061	0.268733	0.266139	0.0194555	0.00328356	0.0700779	0.344013	0.569976	0.468696	0.0239566	0.150839	0.0237128	0.266139	0.188385	0.0346443	0.652069	0.518649	0.0162049	0.0820204	0.0820204	0.40951	0.188385	0.188385	0.0820204	0.188385	0.150839	0.468696	1	0.150839	0.0568816	0.468696	0.00285539	0.266139	0.117968	0.569976
	ATP1A1	1	1	0.000450599	0.000729174	0.159813	0.0580669	0.0452689	0.111755	0.918658	0.934153	0.513661	0.469636	0.630321	0.658408	0.550815	0.0719918	0.00030224	3.21862e-06	0.0178896	0.340819	0.570271	0.468969	0.0569068	0.522277	0.0750719	0.26644	0.188615	0.000301789	1	0.240726	0.00133267	0.00876684	0.00876684	0.00876684	0.188615	0.188615	1	-	0.151032	0.11525	-	0.151032	0.000351385	1	-	0.26644	0.118221	0.570271
	CALM1	1	1	-	-	-	-	-	-	0.219304	-	-	-	-	-	-	0.265552	-	-	-	0.113158	0.187932	0.468148	-	0.521416	0.00646794	0.0715965	0.038824	-	0.265552	0.023104	0.00132136	-	-	-	-	-	-	-	-	-	-	-	-	0.468148	0.00283989	-	-	0.569386
	DHFR	1	1	0.00476004	0.00366154	0.00991793	0.0575259	0.161668	0.11314	0.439576	0.488692	0.331217	0.270834	0.216724	0.175837	0.100252	0.651473	0.0193042	0.00344182	0.0697543	0.3433	0.569387	1	0.0583969	0.150456	0.0243633	0.265539	0.187924	0.0124385	0.651473	0.517784	0.114793	0.0817952	0.0817952	0.409006	0.0388183	0.0388183	0.409006	0.569387	0.150456	0.114793	1	0.0261693	0.0566121	0.468151	0.0261693	1	0.0367488	1
	NQO2	1	0.409006	0.0135091	0.000717888	0.161668	0.782768	0.0460348	0.11314	0.708582	0.933713	0.331217	0.690084	0.634143	0.661459	0.5495	0.651473	0.00554633	0.00104402	0.211898	0.718008	1	0.468151	0.245972	1	0.076463	0.265539	0.187924	0.000295288	0.651473	0.0843218	0.0161364	0.0817952	0.0817952	0.0817952	0.0052314	0.0052314	0.409006	0.0388183	0.0261693	0.0161364	0.0161364	0.00283902	0.000346355	0.468151	0.150456	0.651473	0.117465	1
	TOP2A	1	1	2.98398e-05	0.000115427	0.00161981	0.000308058	0.00979531	0.00459024	0.706897	0.748545	0.859835	0.471507	0.401154	0.174481	0.101582	0.650274	0.00570528	0.000279236	0.00362515	0.026467	0.0392879	0.469789	0.41378	0.151611	0.0240424	0.0131945	0.00532049	0.00119222	0.264348	0.0235218	0.0163433	0.000486884	0.000486884	0.000486884	0.0392879	0.0392879	0.410522	0.571157	0.151611	0.11571	1	0.0264953	-	0.469789	0.0264953	0.264348	0.0363331	0.189311
[truncated: 30 more columns]
